1 **Bacterial Major Vault Protein homologs shed new light on origins of the enigmatic**  
2 **organelle**

3 Tymofii Sokolskyi<sup>1</sup>

4 <sup>1</sup>Trinity College of Arts and Sciences, Duke university, Durham, NC, USA, 27708

5

6 Corresponding author: [tymofii.sokolskyi@duke.edu](mailto:tymofii.sokolskyi@duke.edu)

7

8 **Keywords:** vaults, major vault protein, Cyanobacteria, lateral gene transfer, eukaryogenesis

9

10

## Abstract

11 Vaults are large cone-shaped and highly conservative ribonucleoprotein complexes present in the  
12 cells of most major eukaryote clades. However, despite their wide distribution, their functions  
13 and evolutionary dynamics still remain enigmatic. Several minor functions in modulating  
14 signaling cascades and multidrug resistance phenotypes were previously discovered for  
15 eukaryotic vaults, yet nothing is known about bacterial homologs of the major vault protein  
16 (MVP), a protein that comprises the entirety of vault external surface. Using gene and protein  
17 BLAST searches in NCBI and UniProt databases we identified a number of bacterial species in  
18 prokaryotic taxa Myxococcales, Cytophagales and Oscillatoriales with >50% identity to  
19 eukaryotic MVP sequences. Interestingly, all of these species are characterized by one common  
20 feature – gliding type of motility. Secondary structures of the identified proteins were predicted  
21 using RAPTORX web service and aligned via jFATCAT-flexible algorithm in the RCSB PDB  
22 Java Structure Alignment tool to elucidate structural identity. Coiled coil domain at the MVP C-  
23 terminus of all studied bacterial species resembled TolA protein of *Escherichia coli* by both  
24 structure and sequence. We also showed that MVP sequences from chemotrophic bacteria  
25 Myxococcales and Cytophagales contain a domain homologous to eukaryotic band-7 domain,  
26 unlike cyanobacterial and eukaryotic major vault proteins. As expected, maximum-likelihood  
27 phylogenetic trees for MVP sequences separate studied taxa into two clades – first clade contains  
28 Oscillatoriales (Cyanobacteria) and Eukaryotes and the second one contains chemotrophic  
29 bacteria. In addition, binding prediction via RAPTORX showed great multiplicity GMP and  
30 CMP nucleoside monophosphate binding pockets in Myxococcales and Cytophagales MVP,  
31 unlike eukaryotic and cyanobacterial proteins which had much lower affinity to these substrates.  
32 Due to high similarity of eukaryotic and cyanobacterial MVP sequences and a pattern of its  
33 phylogenetic distribution, we can speculate that the most likely scenario for vault appearance in  
34 eukaryotes is horizontal gene transfer from cyanobacteria. Presence of GMP and CMP binding  
35 pockets in MVP could also point to a function in depleting cytosolic nucleotide concentration  
36 which would be beneficial, for instance, during a viral infection. Further research is necessary to  
37 uncover potential functions of this enigmatic protein in bacteria and to determine its evolutionary  
38 patterns. In addition, a correlation between MVP presence and gliding motility in bacteria could  
39 also lead to elucidating selective pressures on the early evolution of this protein. Unfortunately,  
40 this topic has been largely neglected in recent literature and it can lead us to a much better  
41 understanding of not only current physiological processes but also eukaryogenesis, and even  
42 broader – origins of cellular life.

43 **Introduction**

44 Vaults are large 13 MDa ribonucleoprotein complexes present in cells of many Eukaryota  
45 species (Kedersha et al., 1991). They consist of 3 types of proteins – major vault protein (MVP),  
46 vault poly-ADP ribose polymerase (vPARP), telomerase-associated protein (TEP1) and vault  
47 RNA. TEP1 is also shared with the telomerase complex, part of a so-called TROVE module that  
48 is shared between some ribonucleoproteins and mediates RNA binding (Bateman & Kickhoefer,  
49 2003). The outer surface of a vault particle consists of MVP monomers forming two connected  
50 dome-shaped structures (Mikyias et al., 2004). It has been shown that vault particles are also  
51 capable of opening, possibly to transport other particles inside them (Querol-Audi et al., 2009).  
52 Vaults seem to be very conservative structures present among various Metazoa, Fungi and  
53 Protozoa taxa (Kong et al., 1999), meaning they could perform or could have performed a  
54 globally significant function. Multiple specific functions of this structure known in Metazoa are  
55 implicated in signaling pathway regulation, multidrug resistance, immunity, etc. (Berger et al.,  
56 2009). Currently vaults are even tested as drug and probe delivery vectors (Benner et al., 2017).  
57 These functions include:

- 58 1. Nuclear import of phosphoinositide phosphatase PTEN.
- 59 2. Scaffold in EGFR/MAPK cascade.
- 60 3. Apoptotic suppression via interactions with COP1 protein.
- 61 4. Nuclear import of activated estrogen receptors.
- 62 5. Unidentified role in axonal transport, possibly RNA transport (Li et al., 1999).
- 63 6. Possible regulation of poly-ADP ribosylation to facilitate DNA reparation.
- 64 7. Unidentified role in sea urchin ontogenesis (Stewart et al., 2005).
- 65 8. Multidrug resistance in mammal cells (Izquierdo et al., 1996).
- 66 9. Possible role in Epstein-Barr virus immunity.

67 A hypothesis was proposed for vaults to be an efficient way of amino acid and nucleotide storage  
68 (Shaik, 2013). This could explain their weird phylogenetic distribution – mostly in taxa that lost  
69 essential amino acid biosynthesis pathways and their upregulation during pathogen invasion –  
70 they could act as nutrient sequesters from the cytoplasm (Shaik, 2013). However, if this  
71 explanation is viable, then many questions regarding vault composition arise – what is the  
72 purpose of TEP1 and vPARP presence in the complex, why vaults contain relatively few RNAs,  
73 why are they shaped like they are and specifically why are they hollow inside.

74 Vault's outer surface completely consists of major vault protein monomers. Recently its  
75 homologs were identified in several bacterial taxa, namely in some representatives of  
76 Cyanobacteria, Deltaproteobacteria and Bacteroidetes (Shaik, 2013). However, until now they

77 have not been investigated neither *in silico* nor *in vivo*. Analysis of structure and evolution of  
78 bacterial MVP-like proteins may shed new light on vault function and evolution.

## 79 **Materials and methods**

80 BLAST searches for the Homo sapiens MVP in Uniprot KB Bacteria database uncovered various  
81 proteins, several of which, representing different bacterial clades were selected for further  
82 investigation: *Moorea producens* uncharacterized protein F4Y3B4\_9CYAN, *Saprospira grandis*  
83 uncharacterized protein H6L4P8\_SAPGL, *Microscilla marina* uncharacterized protein  
84 A1ZGE7\_9BACT, and *Enhygromyxa salina* uncharacterized protein A0A0C2D5V5\_9DELT.  
85 Subsequent searches for these proteins found similarities with Tola proteins for various  
86 Proteobacteria and Bacteroidetes, and band 7 (SPFH) domain-containing proteins.

87 Then chosen MVP-like sequences from the first BLAST iteration were aligned with various  
88 Tola protein sequences found in the UniProt database for the respective taxa using local  
89 pairwise alignment tool EMBOSS Water (default settings, Smith-Waterman algorithm; Rice et  
90 al., 2000). Most common region of similarity was identified – sequence of approximately 200-  
91 250 amino acids. Maximum-likelihood phylogenetic tree with 1000 bootstrap replications were  
92 constructed in MEGA 7.0, including some sequences of eukaryotic MVP (Tamura et al., 2007).

93 Secondary structure and binding prediction for isolated regions of some of the studied proteins  
94 was performed with the help of RAPTORX web service (Källberg et al., 2012). Acquired  
95 structure data in the PDB format was then subjected for pairwise structure alignment via  
96 jFATCAT-flexible algorithm in the RCSB PDB Java Structure Alignment tool to confirm  
97 structural identity (Prlić et al., 2010; Ye & Godzik, 2003).

## 98 **Results**

99 **Comparison to Tola.** BLAST searches for these sequences uncovered various Tola proteins;  
100 highest identity of 36% had *Gilliamella* Tola A0A1B9K2Y3\_9GAMM. Series of alignments  
101 between the chosen sequences and Tola and Tola-like proteins of different bacterial species  
102 (*Enhygromyxa*, *Myxococcus*, *Sandaracinus*, *Escherichia*, *Haemophilus*, *Methylophaga*,  
103 *Mangrovibacter*, *Gilliamella*, *Frischella*, *Galibacterium*) showed that the highest similarity is  
104 located in the coiled coil region of the selected proteins and domain II of Tola. Identity variation  
105 between 22% and 37% and alignment of Tola sequences not only with the coiled coil region, but  
106 also with adjacent fragments of MVP shoulder and N-terminal domain suggests that it is most  
107 likely a result of homologous relationship between Tola domain II and MVP.

108 Results of the MOTIF search service on Genome Net (Bioinformatics Center at Kyoto  
 109 University, <http://www.genome.jp/tools/motif/>), Pfam database (Finn et al., 2013) support this  
 110 hypothesis showing TolA domains with E-values up to  $1e-07$  when analyzing bacterial MVP-  
 111 like proteins. Schematic structure comparisons of *Saprospira* MVP-like protein and *Escherichia*  
 112 TolA are shown in **Fig.1, A**.

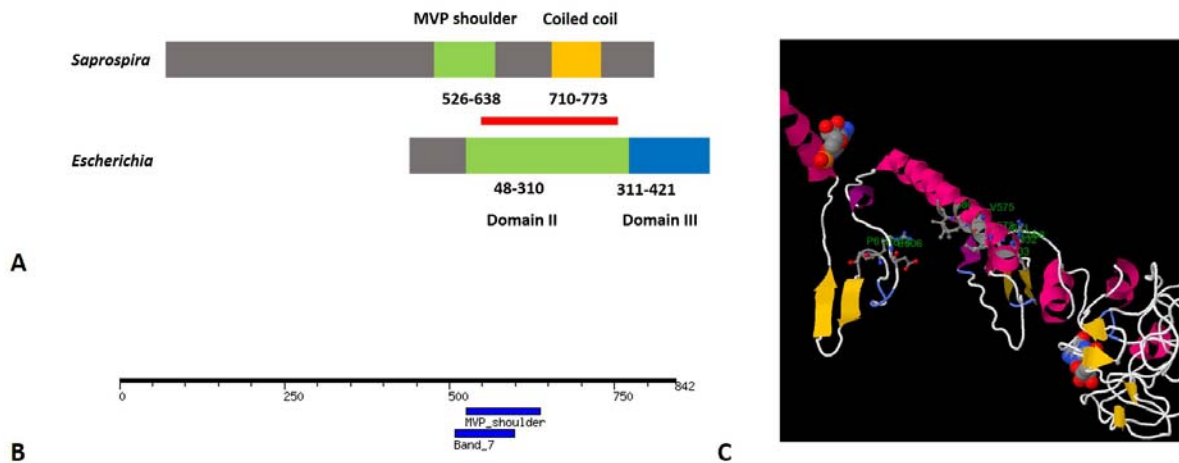

113

114 **Fig.1** Structural features of MVP-like proteins. **A.** Schematic representation of *Saprospira*  
 115 *grandis* uncharacterized protein (upper block) and *Escherichia coli* TolA protein (lower block)  
 116 sequences. Aligned regions are marked with red line (portion of domain II from *E. coli* TolA and  
 117 coiled coil with a small portion of MVP shoulder from *S. grandis* protein). Identity 27,6%,  
 118 similarity 42,0%. **B.** Location of band 7 domain in *Saprospira* protein H6L4P8\_SAPGL (result  
 119 of MOTIF search). **C.** Graphic representation of a predicted GMP-binding site of *Saprospira*  
 120 MVP-like protein.

121 **Structure prediction.** Some of the most similar sequence fragments, corresponding to coiled  
 122 coils of MVP-like proteins and domain II of TolA for some of the studied proteins were  
 123 subjected to structure prediction via RAPTORX web service. Pairwise structural alignment was  
 124 then conducted to support the idea of homology between major vault protein and TolA. Chosen  
 125 sequences include: *Haemophilus* TolA TOLA\_HAEIN (70-275); *Homo* Major Vault Protein  
 126 MVP\_HUMAN (729-805); *Moorea* MVP-like protein F4Y3B4\_9CYAN (750-820); *Saprospira*  
 127 uncharacterized protein H6L4P8\_SAPGL (701-780). Acquired results, summarized in **table 1**,  
 128 confirm the conclusion of evolutionary relationship between TolA and MVP-like proteins  
 129 because of relatively low P-values and RMSD.

|               | <i>Moorea</i> | <i>Homo</i> | <i>Haemophilus</i> | <i>Saprospira</i> |
|---------------|---------------|-------------|--------------------|-------------------|
| <i>Moorea</i> |               |             |                    |                   |

|                    |                |                   |                   |  |
|--------------------|----------------|-------------------|-------------------|--|
| <i>Homo</i>        | 1,79e-04; 3,17 |                   |                   |  |
| <i>Haemophilus</i> | 2,03e-05; 2,96 | 9,93e-04;<br>1,56 |                   |  |
| <i>Saprospira</i>  | 1,94e-08; 3,05 | 2,19e-06;<br>1,17 | 5,34e-06;<br>1,76 |  |

130

131 **Table 1.** Results of jFATCAT-flexible structure alignment of structures, explained in text. First  
132 number represents P-value, second – RMSD value.

133 **Comparison with band 7 domains.** Other than TolA, some BLAST searches for MVP  
134 shoulder-like domains in KB Bacteria database recovered more than 30% identity with band 7  
135 proteins (*Halothermothrix* protein B8D0R4\_HALOH showed the highest result of 33%). In  
136 addition, results of the MOTIF search service also identified SPFH / Band 7 domain in 509-598  
137 region of *Saprospira* sequence H6L4P8\_SAPGL with E-value=0.00039 (**Fig. 1, B**).  
138 Interestingly, same results were observed with other studied bacterial proteins, except  
139 cyanobacterial MVP-like proteins and eukaryotic MVP. This similarity was first reported by  
140 Daly et al., 2013.

141 Secondary structures for corresponding fragments of these two proteins along with *Pongo* MVP  
142 MVP\_PONAB shoulder domain (519-647) and *Homo* stomatin STOM\_HUMAN band 7 domain  
143 (56-227) were predicted and aligned using jFATCAT-flexible algorithm. Resulting RMSD and  
144 P-value are shown in **table 2**. P-values and RMSD are low enough to conclude likely homology.  
145 *Saprospira* MVP shoulder-like domain exhibits significantly higher structural similarity to band  
146 7 domain of stomatin and *Halothermothrix* protein than to MVP shoulder of *Pongo* MVP.

|                        | <i>Halothermothrix</i> | <i>Homo</i>    | <i>Pongo</i>   | <i>Saprospira</i> |
|------------------------|------------------------|----------------|----------------|-------------------|
| <i>Halothermothrix</i> |                        |                |                |                   |
| <i>Homo</i>            | 1,18e-12; 1,55         |                |                |                   |
| <i>Pongo</i>           | 1,57e-01; 3,01         | 1,55e-01; 3,03 |                |                   |
| <i>Saprospira</i>      | 1,18e-14; 1,36         | 6,38e-10; 1,82 | 2,68e-01; 3,26 |                   |

147

148 **Table 2.** Results of jFATCAT-flexible alignment of structures, explained in text. First number  
149 represents P-value, second – RMSD value.

150 **Binding prediction.** Binding prediction via RAPTOR-X server was conducted for *Saprospira*,  
151 *Enhygromyxa*, *Moorea* and *Homo* MVP-like proteins. *Saprospira* protein showed high-

152 multiplicity binding with GMP and CMP. Multiplicity represents the frequency with which the  
153 selected pocket was found in a set of ligand-binding protein structures – generally, if the value is  
154 above 40 the pocket is highly likely true. Multiplicity for the first GMP-binding site is 102, for  
155 the second – 35 (shown on **Fig. 1, C**), for CMP-binding site – 68. For *Enhyngromyxa* it is 102  
156 and 28 for GMP and 72 for CMP. For *Moorea* protein it is only 46 and 12 for GMP and 28 for  
157 CMP; *Homo* MVP shows 37 and 14 for 2 possible GMP-binding sites, 38 for UMP and none for  
158 CMP. All of the possible nucleotide binding sites are located in 500-700 sequence, that  
159 corresponds to the part that aligns with MVP shoulder/band 7 domain. Tola proteins were also  
160 subjected for similar analysis. Neither *Haemophilus* nor *Gilliamella* Tola show any nucleotide  
161 binding *in silico*.

## 162 **Discussion**

163 **Origin of vaults.** We found 2 likely homologies for bacterial MVP-like proteins: Tola and band  
164 7 domain proteins. A maximum-likelihood phylogenetic tree was constructed for complete  
165 protein sequences of various bacterial MVP-like proteins (**Fig. 2**). Two macroclades can be  
166 defined: first one contains Bacteroidetes and Deltaproteobacteria, the second one – eukaryotic  
167 MVP and cyanobacterial MVP-like proteins. The main structural difference between them is  
168 presence of band 7 domain in the sequences of all first clade taxa, and its absence in all second  
169 clade taxa. *Hyalangium* protein A0A085WQF1\_9DELT is the only found non-cyanobacterial  
170 MVP-like protein lacking band 7 domain, no similar deltaproteobacterial sequences were found.  
171 Band 7 domains are generally known for association with lipid membranes (Tavernarakis et al.,  
172 1999).

173

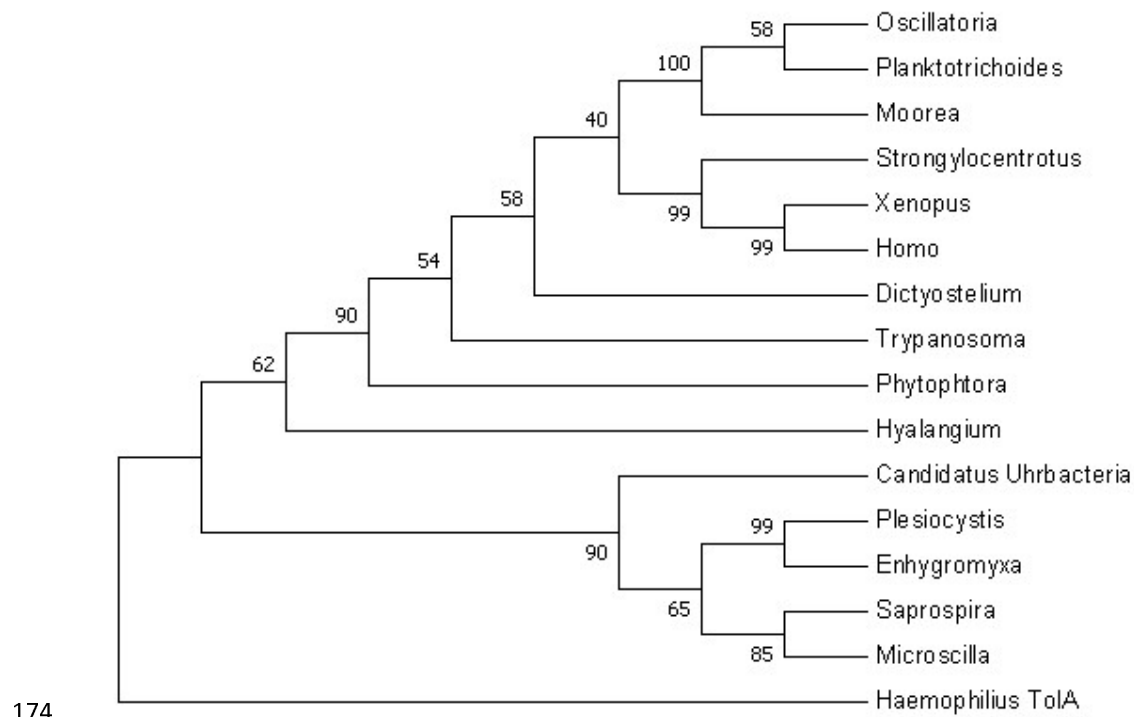

175 **Fig. 2** Maximum-likelihood phylogenetic tree derived for various bacterial MVP-like proteins.  
176 *Haemophilus TolA* sequence was used as an outgroup.

177 One of these bacteria, specifically *Saprospira grandis*, displays an unusual characteristic – rod-  
178 shaped protein structures in the cytoplasm, called raphidosomes (Saw et al., 2012). Their  
179 functions are currently unknown. One of the raphidosome proteins, SGRA\_0791, was shown to  
180 contain Band 7-like domain (Saw et al., 2012). However, alignment of its 25-232 sequence that  
181 corresponds to Band 7 domain, according to Uniprot, with 500-600 sequence of *Saprospira* Band  
182 7-like domain displayed only 20% identity, that is very low for such a short sequence, especially  
183 compared to >50% identities of MVP-like proteins between each other. At least for now there is  
184 no evidence of connection between raphidosomes and MVP-like proteins.

185 Major vault protein homologs were not found in archaea, that are closely related to eukaryotes.  
186 Therefore, MVP-like proteins were likely to appear in the bacterial lineage after  
187 Bacteria/Archaea divergence and then experience secondary loss in some lineages. Alternatively,  
188 they MVP-like proteins were present in the Last Universal Common Ancestor and then lost in  
189 Archaea and retained in Bacteria. However, if that is the case, then the loss should have occurred  
190 after the divergence of Eukarya and Archaea and then simultaneously happen in all  
191 contemporary archaeal clades which seems improbable. Therefore, we suggest that the most  
192 likely scenario of MVP appearance in Eukarya is lateral transfer from a bacterial lineage, most  
193 likely Cyanobacteria (Oscillatoriales), because they possess MVP-like protein with more than



194 50% identity to MVP. This event probably has happened before the divergence of major protist  
195 groups, animals, plants and fungi (Daly et al., 2013). This hypothesis is congruent with the  
196 phylogeny shown on **Fig. 2** that groups together cyanobacterial and eukaryotic MVP-like  
197 proteins.

198 Collected information suggests a probable evolutionary scenario for major vault protein,  
199 schematically depicted in **Fig. 3**. Pre-MVP appeared in the common ancestor of most bacterial  
200 phyla and contained band 7-like (SPFH) and TolAII-like domains (possibility of independent  
201 appearance of both domain types in many distantly related phyla is very low). Consequently, a  
202 duplication and a series of deletions occurred resulting in TolA protein, that lost band 7 domain  
203 in favor of a short transmembrane helix and acquired a variable N-terminal TolAIII domain.  
204 Some lineages, including Bacteroidetes, Cyanobacteria (at least Oscillatoriales) and  
205 Deltaproteobacteria retained the original pre-MVP. Ability to bind NMP appeared prior to  
206 Cyanobacteria/Bacteroidetes/Proteobacteria divergence, because it can be found in both *Moorea*  
207 and *Saprospira* proteins.

208 Cyanobacterial pre-MVP evolution made it move away from cell membrane transforming its  
209 band 7 domain into MVP shoulder. Cyanobacterial proteins could represent the first evolutionary  
210 steps towards the vault complex formation. Then, TolAII-like domain evolved to vault coiled  
211 coils that facilitate MVP aggregation into vaults, as demonstrated in modern eukaryotes (van  
212 Zon et al., 2002). Similar structure of *Hyalangium* protein could have been acquired  
213 convergently or due to a separate lateral gene transfer event. Then sequence of the resulting  
214 protein was laterally transmitted from cyanobacteria to early eukaryotes (most likely due to  
215 phagotrophic lifestyle of the latter ones (Shaik, 2013)) or due to an endosymbiotic event and was  
216 subsequently lost in various lineages possibly including plants and fungi (Daly et al., 2013).

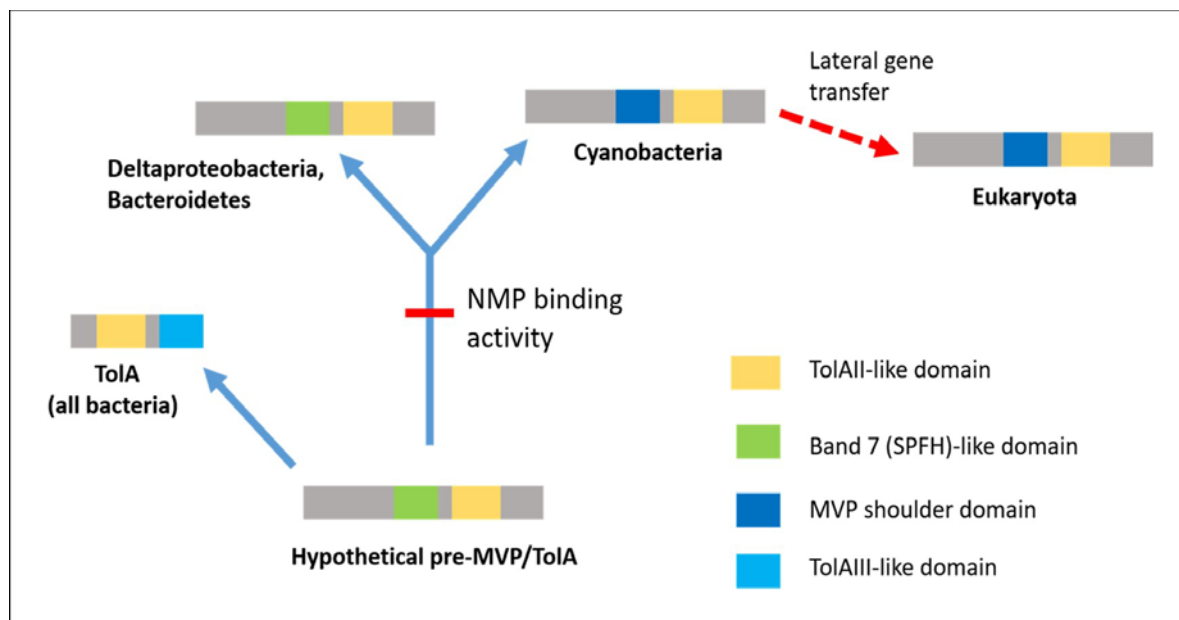

218 **Figure 3.** Most likely scenario of major vault protein evolution. Probably, NMP-binding  
219 appeared in Cyanobacteria and Deltaproteobacteria/Bacteroidetes MVP common ancestor, and  
220 then started waning in Cyanobacteria.

221 **Future directions.** All bacteria with MVP-like proteins identified here despite belonging to  
222 highly different taxa share a common characteristic: gliding motility (Engene et al., 2012; Iizuka  
223 et al., 2003 [1, 2]; Reichenbach, 2015). Specifically, these taxa include Deltaproteobacteria (only  
224 order Myxococcales), Bacteroidetes (specifically Cytophagales) and Cyanobacteria (only  
225 Oscillatoriales). This type of locomotion usually is prevalent among bacteria living in low-water  
226 content environments, including biofilms, mats, soils or hypersaline habitats, that is also true for  
227 the species studied here (Spormann, 1999). Interestingly, TolA protein that is partially  
228 homologous to bacterial MVP-like proteins is involved in flagellar locomotion (Cascales et al.,  
229 2001). Therefore MVP-like proteins could have played a role in the transition to gliding motility  
230 in selected taxa, mechanism of which is poorly studied (McBride, 2001).

231 Observation of MVP-like proteins NMP binding also supports the idea of vaults functioning as  
232 sequesters and regulators, as was proposed by Shaik, 2013. Bacterial MVP-like proteins could  
233 perform the same function vaults do, but without necessary aggregation into vaults. One of the  
234 interesting possible early functions of MVP-like proteins can be pathogen defense. By  
235 sequestering nucleotides and amino acids from the cytoplasm they can at least decrease the rate  
236 of bacteriophage reproduction. Nucleotides are required for bacteriophage replication, while they  
237 are not immediately necessary for bacterium during the infection process because no DNA  
238 replication is occurring (**Fig. 4**). It is possible that MVP demonstrates a lot weaker nucleotide  
239 binding than MVP-like proteins because of eukaryotic compartmentalization – deoxynucleotide

240 concentration is a lot smaller in eukaryotic cytosol than in bacterial, meaning there is less sense  
241 in sequestering it during bacterial/viral infection. However, eukaryotes face wider systematic  
242 range of pathogens, meaning that a new way of spatial nutrient isolation should have been  
243 developed – that is aggregation into large hollow structures (vaults).

244 Membrane-association via band 7 domains also could help them maintain this function. It has  
245 been shown that band 7 domain proteins can form oligomeric ring structures in mitochondria  
246 (Tatsuta et al., 2005) and cyanobacteria (Boehm et al., 2009) that are membrane-associated. This  
247 leads to an idea that MVP-like proteins could have also been associated with toxin export,  
248 similar to modern vaults involved in multidrug resistant phenotypes (Izquierdo et al., 1996).  
249 Alternatively, they could have also performed direct detoxification of substances such as toxic  
250 anions, as was demonstrated for modern MVP and tellurite anions (Suprenant et al., 2007).  
251 However, these hypotheses are purely speculative and require experimental verification.

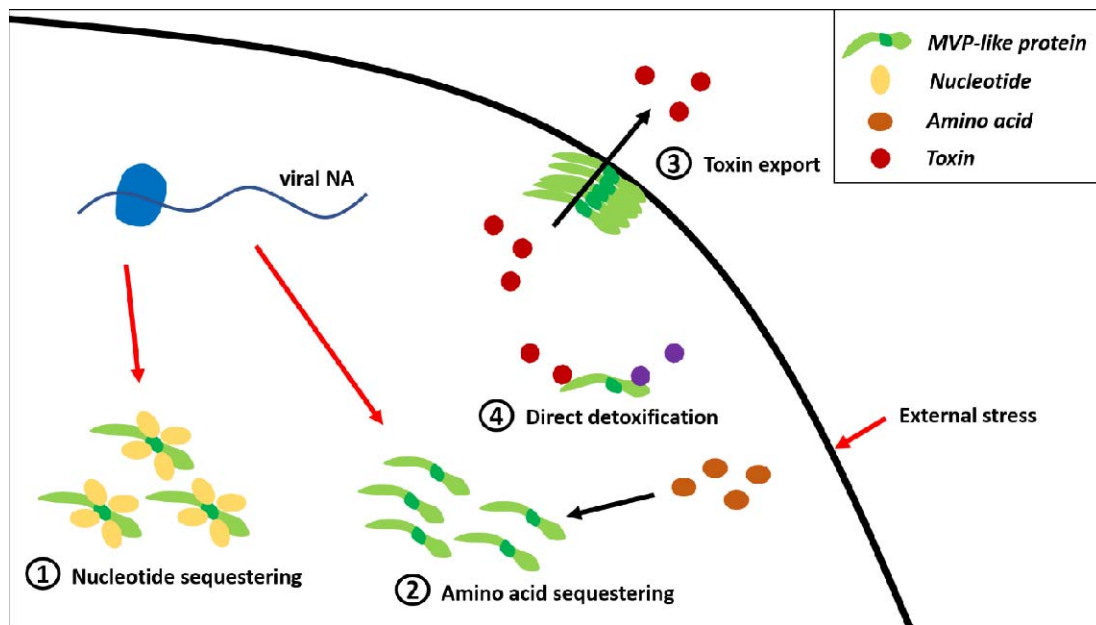

253 **Figure 4.** Possible functions of bacterial MVP-like proteins in cell protection. 1 – nucleotide  
254 sequestering from the cytosol to prevent viral replication; 2 – amino acid sequestering from the  
255 cytosol to affect viral protein synthesis or to conserve energy; 3 – export of toxic substances due  
256 to oligomerization through band 7 domains and membrane binding; 4 – direct detoxification.

257 MVP is one of the very few protein groups that are conserved among both Bacteria and Eukarya  
258 (Kedersha et al., 1990). It has been suggested that they were already present in last eukaryotic  
259 common ancestor, however their discovery in bacteria significantly expands their importance  
260 (Daly et al., 2013). In addition, the potential of cyanobacteria-eukaryote lateral gene transfer is  
261 intriguing and deserves further investigation. Unfortunately, the vault system has been largely

262 neglected in the scientific community showing lack of publications even despite advances in  
263 molecular techniques over the past 35 years since the discovery of vaults (Kedersha & Rome,  
264 1986). However, due to its conservativity and wide distribution, elucidating functions of vaults  
265 and MVP-like proteins in both prokaryotes and eukaryotes and their evolutionary patterns is  
266 necessary to understand eukaryogenesis and the broader picture of origins of cellular life. More  
267 *in silico*, *in vivo* and *in vitro* studies need to be done on this topic so that we can understand why  
268 these systems were retained by so many different taxa and how did they influence our evolution.

## 269 **References**

- 270 Asfa Alli Shaik. The unique phylogenetic distribution of vault particles reveals its functional  
271 roles. A thesis submitted for the degree of doctor of Philosophy, Department of  
272 biological sciences, National university of Singapore 2013
- 273 Bateman, A., & Kickhoefer, V. (2003). The TROVE module: a common element in  
274 Telomerase, Ro and Vault ribonucleoproteins. *BMC bioinformatics*, 4(1), 49.
- 275 Benner, N. L., Zang, X., Buehler, D. C., Kickhoefer, V. A., Rome, M. E., Rome, L. H., &  
276 Wender, P. A. (2017). Vault nanoparticles: chemical modifications for imaging and  
277 enhanced delivery. *ACS nano*, 11(1), 872-881.
- 278 Berger, W., Steiner, E., Grusch, M., Elbling, L., & Micksche, M. (2009). Vaults and the  
279 major vault protein: novel roles in signal pathway regulation and immunity. *Cellular  
280 and molecular life sciences*, 66(1), 43.
- 281 Boehm, M., Nield, J., Zhang, P., Aro, E. M., Komenda, J., & Nixon, P. J. (2009). Structural  
282 and mutational analysis of band 7 proteins in the cyanobacterium *Synechocystis* sp.  
283 strain PCC 6803. *Journal of bacteriology*, 191(20), 6425-6435.
- 284 Cascales, E., Lloubès, R., & Sturgis, J. N. (2001). The TolQ–TolR proteins energize TolA  
285 and share homologies with the flagellar motor proteins MotA–MotB. *Molecular  
286 microbiology*, 42(3), 795-807.
- 287 Corda, D., & Di Girolamo, M. (2003). Functional aspects of protein  
288 mono-ADP-ribosylation. *The EMBO journal*, 22(9), 1953-1958.
- 289 Daly, T. K., Sutherland-Smith, A. J., & Penny, D. (2012). Beyond BLASTing: tertiary and  
290 quaternary structure analysis helps identify major vault proteins. *Genome biology and  
291 evolution*, 5(1), 217-232.

- 292       Daly, T. K., Sutherland-Smith, A. J., & Penny, D. (2013). In silico resurrection of the Major  
293       Vault Protein suggests it is ancestral in modern eukaryotes. *Genome biology and*  
294       *evolution*, 5(8), 1567-1583.
- 295       Engene, N., Rottacker, E. C., Kaštovský, J., Byrum, T., Choi, H., Ellisman, M. H., ... &  
296       Gerwick, W. H. (2012). *Moorea producens* gen. nov., sp. nov. and *Moorea bouillonii*  
297       comb. nov., tropical marine cyanobacteria rich in bioactive secondary  
298       metabolites. *International journal of systematic and evolutionary microbiology*, 62(Pt  
299       5), 1171.
- 300       Finn, R. D., Bateman, A., Clements, J., Coghill, P., Eberhardt, R. Y., Eddy, S. R., ... &  
301       Sonnhammer, E. L. (2013). Pfam: the protein families database. *Nucleic acids*  
302       *research*, 42(D1), D222-D230.
- 303       Iizuka, T., Jojima, Y., Fudou, R., Hiraishi, A., Ahn, J. W., & Yamanaka, S. (2003).  
304       *Plesiocystis pacifica* gen. nov., sp. nov., a marine myxobacterium that contains  
305       dihydrogenated menaquinone, isolated from the Pacific coasts of Japan. *International*  
306       *journal of systematic and evolutionary microbiology*, 53(1), 189-195.
- 307       Iizuka, T., Jojima, Y., Fudou, R., Tokura, M., Hiraishi, A., & Yamanaka, S. (2003).  
308       *Enhygromyxa salina* gen. nov., sp. nov., a slightly halophilic myxobacterium isolated  
309       from the coastal areas of Japan. *Systematic and applied microbiology*, 26(2), 189-196.
- 310       Izquierdo, M. A., Scheffer, G. L., Flens, M. J., Giaccone, G., Broxterman, H. J., Meijer, C. J.,  
311       ... & Scheper, R. J. (1996). Broad distribution of the multidrug resistance-related vault  
312       lung resistance protein in normal human tissues and tumors. *The American journal of*  
313       *pathology*, 148(3), 877.
- 314       Källberg, M., Wang, H., Wang, S., Peng, J., Wang, Z., Lu, H., & Xu, J. (2012). Template-  
315       based protein structure modeling using the RaptorX web server. *Nature*  
316       *protocols*, 7(8), 1511.
- 317       Kedersha, N. L., & Rome, L. H. (1986). Isolation and characterization of a novel  
318       ribonucleoprotein particle: large structures contain a single species of small  
319       RNA. *The Journal of cell biology*, 103(3), 699-709.
- 320       Kedersha, N. L., Heuser, J. E., Chugani, D. C., & Rome, L. H. (1991). Vaults. III. Vault  
321       ribonucleoprotein particles open into flower-like structures with octagonal  
322       symmetry. *The Journal of cell biology*, 112(2), 225-235.

- 323 Kedersha, N. L., Miquel, M. C., Bittner, D., & Rome, L. H. (1990). Vaults. II.  
324 Ribonucleoprotein structures are highly conserved among higher and lower  
325 eukaryotes. *The Journal of cell biology*, *110*(4), 895-901.
- 326 Kong, L. B., Siva, A. C., Rome, L. H., & Stewart, P. L. (1999). Structure of the vault, a  
327 ubiquitous cellular component. *Structure*, *7*(4), 371-379.
- 328 Lewin, R. A. (1997). *Saprospira grandis*: A Flexibacterium That Can Catch Bacterial Prey  
329 by "Ixotrophy". *Microbial ecology*, *34*(3), 232-236.
- 330 Li, J. Y., Volkandt, W., Dahlstrom, A., Herrmann, C., Blasi, J., Das, B., & Zimmermann, H.  
331 (1999). Axonal transport of ribonucleoprotein particles (vaults). *Neuroscience*, *91*(3),  
332 1055-1065.
- 333 McBride, M. J. (2001). Bacterial gliding motility: multiple mechanisms for cell movement  
334 over surfaces. *Annual Reviews in Microbiology*, *55*(1), 49-75.
- 335 Mikyias, Y., Makabi, M., Raval-Fernandes, S., Harrington, L., Kickhoefer, V. A., Rome, L.  
336 H., & Stewart, P. L. (2004). Cryoelectron microscopy imaging of recombinant and  
337 tissue derived vaults: localization of the MVP N termini and VPARP. *Journal of*  
338 *molecular biology*, *344*(1), 91-105.
- 339 Prlić, A., Bliven, S., Rose, P. W., Bluhm, W. F., Bizon, C., Godzik, A., & Bourne, P. E.  
340 (2010). Pre-calculated protein structure alignments at the RCSB PDB  
341 website. *Bioinformatics*, *26*(23), 2983-2985.
- 342 Querol-Audí, J., Casañas, A., Usón, I., Luque, D., Castón, J. R., Fita, I., & Verdager, N.  
343 (2009). The mechanism of vault opening from the high resolution structure of the  
344 N-terminal repeats of MVP. *The EMBO journal*, *28*(21), 3450-3457.
- 345 Reichenbach, H. 2015. Hyalangiium gen. nov. *Bergey's Manual of Systematics of Archaea*  
346 *and Bacteria*. 1-4.
- 347 Rice, P., Longden, I., & Bleasby, A. (2000). EMBOSS: the European molecular biology  
348 open software suite.
- 349 Saw, J. H., Yuryev, A., Kanbe, M., Hou, S., Young, A. G., Aizawa, S. I., & Alam, M.  
350 (2012). Complete genome sequencing and analysis of *Saprospira grandis* str. Lewin, a  
351 predatory marine bacterium. *Standards in Genomic Sciences*, *6*(1), 84.
- 352 Spormann, A. M. (1999). Gliding Motility in Bacteria: Insights from Studies of *Myxococcus*  
353 *xanthus*. *Microbiol. Mol. Biol. Rev.*, *63*(3), 621-641.

- 354 Stewart, P. L., Makabi, M., Lang, J., Dickey-Sims, C., Robertson, A. J., Coffman, J. A., &  
355 Suprenant, K. A. (2005). Sea urchin vault structure, composition, and differential  
356 localization during development. *BMC developmental biology*, 5(1), 3.
- 357 Suprenant, K. A., Bloom, N., Fang, J., & Lushington, G. (2007). The major vault protein is  
358 related to the toxic anion resistance protein (TelA) family. *Journal of Experimental*  
359 *Biology*, 210(6), 946-955.
- 360 Tamura, K., Dudley, J., Nei, M., & Kumar, S. (2007). MEGA4: molecular evolutionary  
361 genetics analysis (MEGA) software version 4.0. *Molecular biology and*  
362 *evolution*, 24(8), 1596-1599.
- 363 Tatsuta, T., Model, K., & Langer, T. (2005). Formation of membrane-bound ring complexes  
364 by prohibitins in mitochondria. *Molecular biology of the cell*, 16(1), 248-259.
- 365 Tavernarakis, N., Driscoll, M., & Kyrpides, N. C. (1999). The SPFH domain: implicated in  
366 regulating targeted protein turnover in stomatins and other membrane-associated  
367 proteins. *Trends in biochemical sciences*, 24(11), 425-427.
- 368 van Zon, A., Mossink, M. H., Schoester, M., Scheffer, G. L., Scheper, R. J., Sonneveld, P., &  
369 Wiemer, E. A. (2002). Structural domains of vault proteins: a role for the coiled coil  
370 domain in vault assembly. *Biochemical and biophysical research*  
371 *communications*, 291(3), 535-541.
- 372 Ye, Y., & Godzik, A. (2003). Flexible structure alignment by chaining aligned fragment pairs  
373 allowing twists. *Bioinformatics*, 19(suppl\_2), ii246-ii255.
